# Supplementary material for: Risk prediction tool for use and predictors of duration of postoperative oxygen therapy in children undergoing non-cardiac surgery: a case-control study
Source: PubMed Central journal article supplement (PMC6214164; doi:10.1186/s12871-018-0595-4), 2018-11-02
Supplement: 12871_2018_595_MOESM2_ESM.pdf [file 12871_2018_595_MOESM2_ESM.pdf]

Additional file 2 Univariate hurdle model predicting duration of postoperative oxygen therapy use in children undergoing non-cardiac surgery (n=1440)

| Variables                                        | Count ratio (95% CI) | p value |
|--------------------------------------------------|----------------------|---------|
| Body mass index (Ref: 15-24.9)                   |                      | 0.063   |
| 5-14.9                                           | 1.33 (1.01, 1.76)    |         |
| 25-60                                            | 1.55 (0.98, 2.45)    |         |
| Upper respiratory tract infection (Ref: No) Yes  | 0.54 (0.33, 0.88)    | 0.02    |
| Pulmonary disease (Ref: No) Yes                  | 1.89 (1.06, 3.37)    | 0.006   |
| Hyper-reactive airway (Ref: No) Yes              | 0.91 (0.56, 1.49)    | 0.74    |
| Anemia (Ref: No) Yes                             | 1.22 (0.93, 1.59)    | 0.16    |
| Snoring (Ref: No) Yes                            | 0.44 (0.14, 1.40)    | 0.17    |
| Non-cyanotic heart disease (Ref: No) Yes         | 0.88 (0.57, 1.37)    | 0.37    |
| Probable difficult airway (Ref: No) Yes          | 2.08 (1.26, 3.44)    | 0.006   |
| Risk of aspiration (Ref: No) Yes                 | 1.05 (0.52, 2.11)    | 0.61    |
| History of delayed development (Ref: No) Yes     | 2.37 (1.45, 3.85)    | <0.001  |
| ASA physical status (Ref: 2)                     |                      | <0.001  |
| 1                                                | 0.85 (0.51, 1.44)    |         |
| 3                                                | 1.69 (1.29, 2.21)    |         |
| Emergency case (Ref: Elective)                   | 0.9 (0.66, 1.21)     | 0.49    |
| Site of procedure (Ref: Eye)                     |                      | <0.001  |
| Urologic                                         | 1.70 (0.82, 3.53)    |         |
| Airway                                           | 3.57 (1.80, 7.08)    |         |
| Ear-nose-face                                    | 2.52 (1.14, 5.57)    |         |
| Thoracic                                         | 4.93 (2.29, 10.58)   |         |
| Intra-abdomen                                    | 4.08 (2.03, 8.21)    |         |
| Orthopedic                                       | 1.58 (0.79, 3.19)    |         |
| Intra-cranial                                    | 1.21 (0.47, 3.11)    |         |
| Gastrointestinal scope                           | 2.05 (0.87, 4.83)    |         |
| Cardiac catheterization                          | 1.60 (0.70, 3.68)    |         |
| Choice of anesthesia (Ref: GA only)              |                      | 0.007   |
| GA with epidural/caudal                          | 0.66 (0.43, 1.01)    |         |
| GA with peripheral nerve block                   | 0.18 (0.06, 0.52)    |         |
| Airway device (Ref: Facemask/ LMA)               |                      | 0.01    |
| Spontaneous breathing with non-rebreathing mask  | 1.19 (0.36, 3.92)    |         |
| Endotracheal tube intubation                     | 1.98 (1.29, 3.05)    |         |
| Neuromuscular blocking agent (Ref: None)         |                      | 0.02    |
| Succinylcholine                                  | 1.43 (0.94, 2.18)    |         |
| Aminosteroid derivatives                         | 1.03 (0.63, 1.68)    |         |
| Benzylisoquinolines                              | 1.67 (1.21, 2.30)    |         |
| Narcotic used (Ref: Fentanyl)                    |                      | 0.03    |
| Morphine                                         | 0.60 (0.41, 0.87)    |         |
| None                                             | 0.70 (0.48, 1.02)    |         |
| Anesthetic time (hour) (Ref: <1)                 |                      | 0.87    |
| 1 - <3                                           | 1.16 (0.73, 1.86)    |         |
| ≥3                                               | 1.07 (0.64, 1.83)    |         |
| Respiratory events during anesthesia (Ref: None) |                      | 0.062   |
| Upper airway obstruction and laryngospasm        | 2.04 (1.04, 4.00)    |         |
| Bronchospasm/wheezing                            | 0.85 (0.50, 1.43)    |         |
| Desaturation                                     | 0.86 (0.65, 1.14)    |         |

---

p-value by Likelihood ratio test, ASA= American Society of Anesthesiologists;  
CI=Confidence interval; GA=General anesthesia
